# Supplementary material for: Geraniin Ameliorates Hypertensive Vascular Remodelling in a Diet-Induced Obese Animal Model through Antioxidant and Anti-Inflammatory Effects
Source: MDPI journal article supplement (doi:10.3390/nu15122696), 2023-06-09
Supplement: s1 [file s1]

## Supplementary file

### Supplementary S1: Geraniin extraction and purification

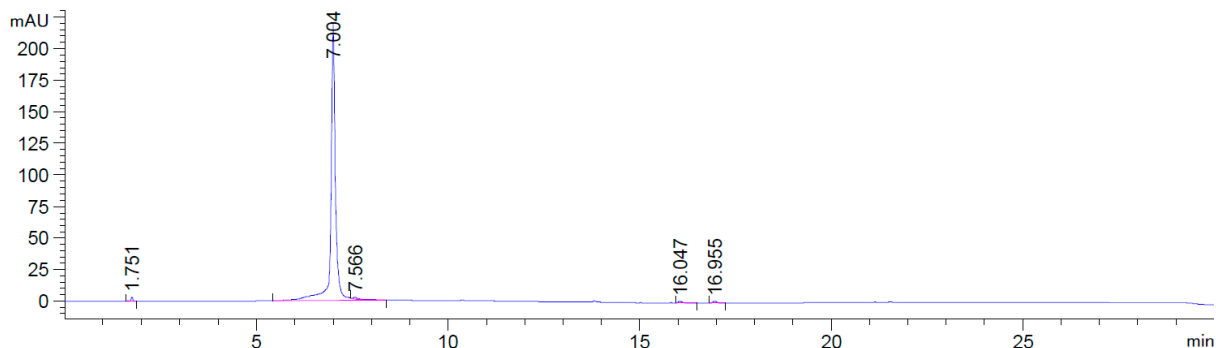

**Figure S1.** HPLC chromatogram of the purified geraniin that showed a purity of 96.7%.

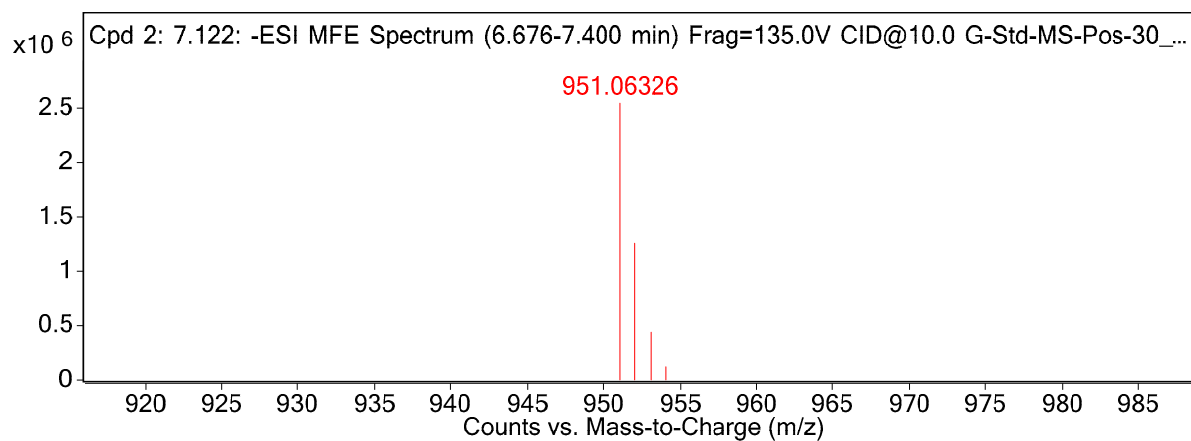

**Figure S2.** Mass-to-charge ratio of the purified geraniin as determined by the negative ionization mode of LC-MS.

**Table S1.** <sup>1</sup>H-NMR chemical shifts of the purified geraniin in comparison to the data published by [23].

| Functional groups | <sup>1</sup> H-NMR chemical shift (300 MHz, DMSO-d <sub>6</sub> ) |              |
|-------------------|-------------------------------------------------------------------|--------------|
|                   | Purified geraniin                                                 | [23]         |
| Glucose           |                                                                   |              |
| 1                 | 6.36 (1H, d)                                                      | 6.35 (1H, d) |
| 2                 | 5.33 (1H, d)                                                      | 5.33 (1H, d) |
| 3                 | 5.40 (1H, s)                                                      | 5.39 (1H, s) |
| 4                 | 5.21 (1H, s)                                                      | 5.20 (1H, s) |
| 5                 | 4.70 (1H, t)                                                      | 4.70 (1H, t) |
| 6                 | 4.38 (2H, m)                                                      | 4.37 (2H, m) |

|                    |                    |                    |
|--------------------|--------------------|--------------------|
| Galloyl (Ring A)   |                    |                    |
| 2 & 6              | 7.03 (2H, s)       | 7.03 (2H, s)       |
| HDDP (Rings B & C) |                    |                    |
| 3 & 3'             | 6.46, 6.78 (1H, s) | 6.45, 6.78 (1H, s) |
| DHHDP (Ring D)     |                    |                    |
| 3                  | 7.05 (1H, s)       | 7.05 (1H, s)       |
| DHHDP (Ring E)     |                    |                    |
| 1'                 | 4.88 (1H, s)       | 4.88 (1H, s)       |
| 3'                 | 6.36 (1H, s)       | 6.38 (1H, s)       |

**Supplementary S2: Nutritional composition of the purified ingredient-based ND and HFD pellets**

**Table S2.** Macronutrient composition and ingredients of ND and HFD pellets [24].

| Macronutrient           | Normal diet | High-fat diet |
|-------------------------|-------------|---------------|
| Protein (kcal%)         | 20          | 20            |
| Carbohydrate (kcal%)    | 70          | 20            |
| Lipid (kcal%)           | 10          | 60            |
| Saturated (%)           | 36.6        | 57.9          |
| Monounsaturated (%)     | 29.0        | 28.8          |
| Polyunsaturated (%)     | 32.0        | 8.4           |
| Trans (%)               | 1.8         | 3.6           |
| Energy content (kcal/g) | 3.9         | 5.3           |
|                         |             |               |
| Ingredient              |             |               |
| Casein                  | 200         | 200           |
| L-cystine               | 3           | 3             |
| Corn starch             | 525.5       | 18            |
| Maltodextrin            | 125         | 125           |
| Sugar                   | 50          | 50            |
| Cellulose               | 50          | 50            |

|                             |       |       |
|-----------------------------|-------|-------|
| Milk fat                    | 20    | 245   |
| Corn oil                    | 25    | 25    |
| AIN-93G Mineral mix         | 35    | 35    |
| AIN-93-VX Vitamin mix       | 10    | 10    |
| Choline bitartrate          | 2     | 2     |
| <i>l</i> -butylhydroquinone | 0.014 | 0.014 |

### Supplementary S3: Vasomotor assessment of the thoracic aorta

(a)

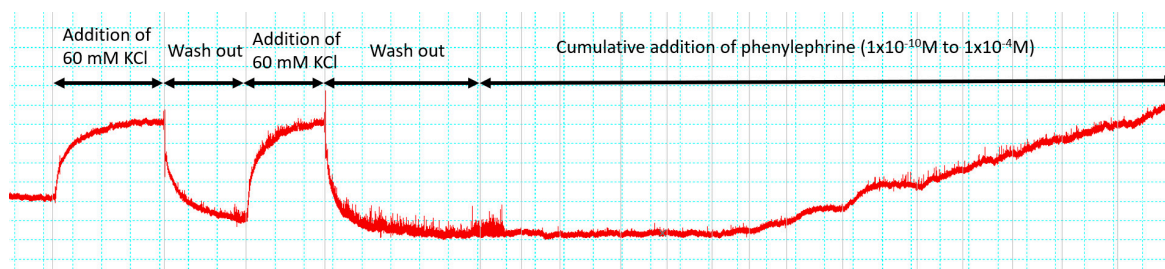

(b)

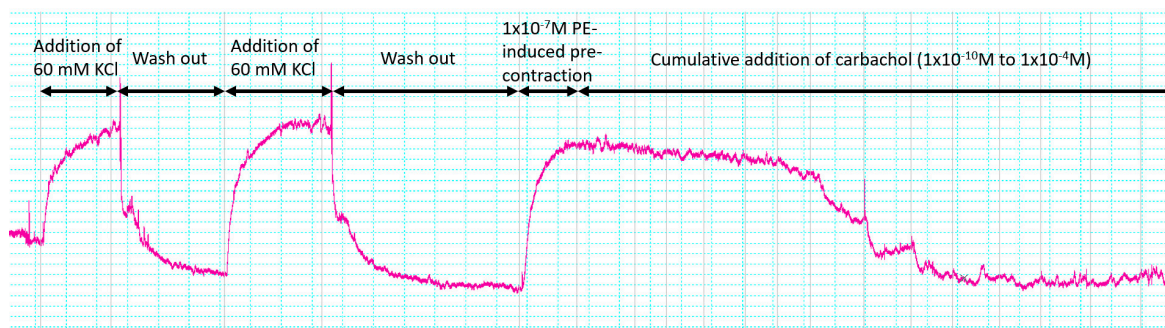

**Figure S3.** Representative isometric trace of (a) phenylephrine-induced aortic ring contraction and (b) carbachol-induced relaxation on the phenylephrine-pre-contracted aortic ring isolated from rats receiving a ND.

## Supplementary S4: RNA extraction and real-time PCR

(a)

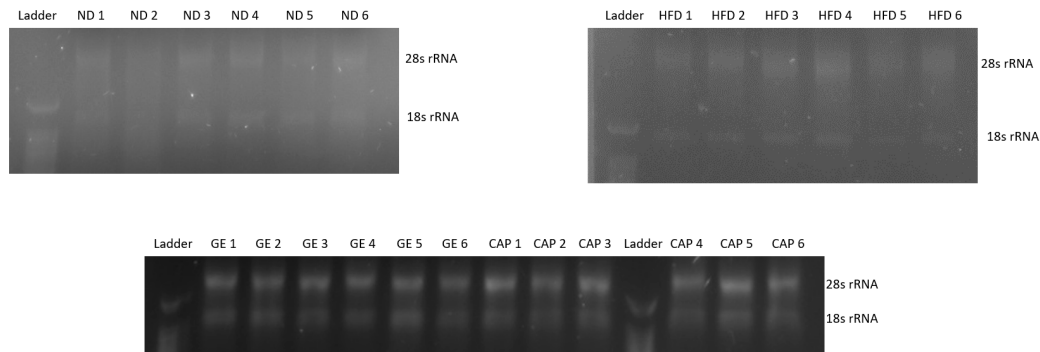

(b)

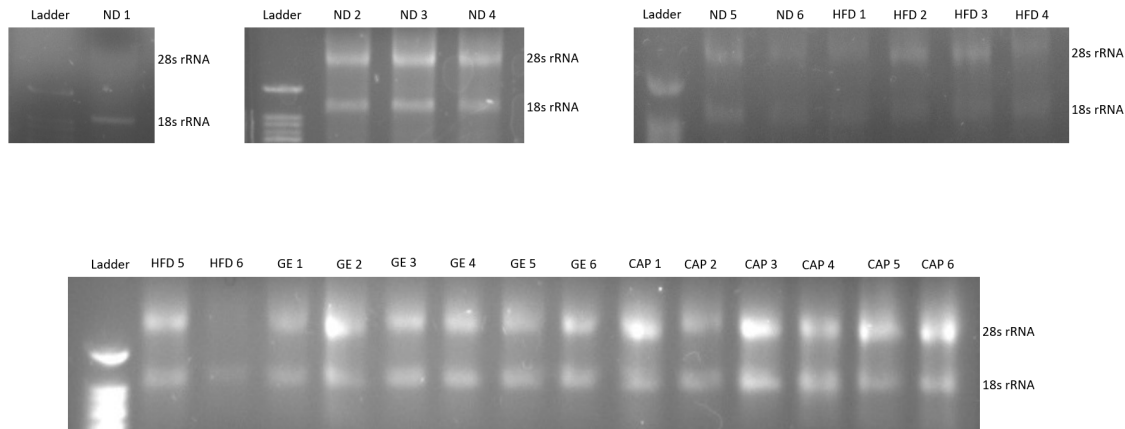

**Figure S4.** Agarose gel image of the RNA samples extracted from the (a) thoracic aorta and (b) PBMCs of rats assigned to different treatment groups. Two clear RNA bands are 18S (1.9 kb) and 28S (4.7 kb) ribosomal RNA (rRNA). The samples were run in a 1% agarose gel (0.5X TBE buffer) at 50V for 45 mins. ND, normal diet; HFD, high-fat diet; GE, geraniin; CAP, captopril.

**Table S3.** Accession numbers, forward and reverse primers of the endogenous reference and target genes as well as amplicon size of the PCR products.

| Target gene   | Accession number | Nucleotide sequence (5' → 3')    |                                | Amplicon size (bp) |
|---------------|------------------|----------------------------------|--------------------------------|--------------------|
|               |                  | Forward primer                   | Reverse primer                 |                    |
| <i>Bac*</i>   | NM_031144        | GTA TGG GTC AGA<br>ACG ACT CC    | GTT CAA TGG GGT<br>ACT TCA GG  | 81                 |
| <i>Hrpt1*</i> | NM_012583        | CTG GAA AGA ACG<br>TCT TGA TTG   | GTA TCC AAC ACT<br>TCG AGA GG  | 146                |
| <i>Sdha*</i>  | NM_130428        | GGC TTT CAC TTC TCT<br>GTT GG    | CCA CAG CAT CAA<br>ACT CAT GG  | 103                |
| <i>iNOS</i>   | NM_012611        | GAC TGG ACT TTT AGA<br>GAC GCT T | TGT CTG TGA CTT TGT<br>GCT TCT | 116                |

|               |              |                                  |                                  |     |
|---------------|--------------|----------------------------------|----------------------------------|-----|
|               |              |                                  |                                  |     |
| <i>p47</i>    | NM_053734    | ACA CCT TCA TTC GCC<br>ACA TC    | GTA GAC CAC CTT<br>CTC CGA CA    | 116 |
| <i>Chi3l1</i> | NM_053560    | CTG AGC AGG AGT TTC<br>TCT GTG   | CTA TGG CTT TGA TGG<br>ACT GGA   | 138 |
| <i>Itgax</i>  | XM_574569    | ATC TGT GTA AGT GAT<br>GCT ACC C | CTG CTT TCT ACT GGA<br>CTC ATC G | 127 |
| <i>CD163</i>  | NM_001107887 | CTG AAA TCC TCG GGT<br>TGG CA    | TGT AGC TGT GGT CAT<br>CCG TG    | 93  |

\* denotes the endogenous reference genes.

*Bac*,  $\beta$ -actin; *Hrpt1*, hypoxanthine phosphoribosyltransferase 1; *Sdha*, succinate dehydrogenase complex flavoprotein subunit A; *iNOS*, inducible nitric oxide synthase; *p47*, NADPH oxidase p47<sup>phox</sup> subunit; *Chi3l1*, chitinase-3-like protein 1; *Itgax*, integrin alpha X; PBMCs, peripheral blood mononuclear cells.

# Supplementary S5: Gelatin zymography of the thoracic aorta

(a)

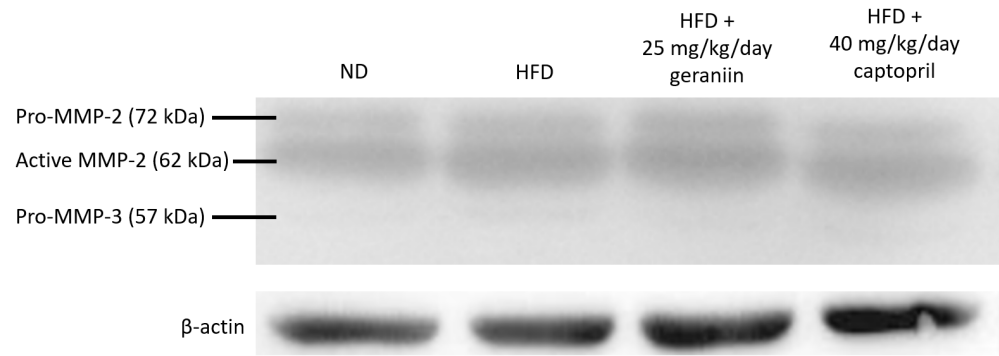

(b)

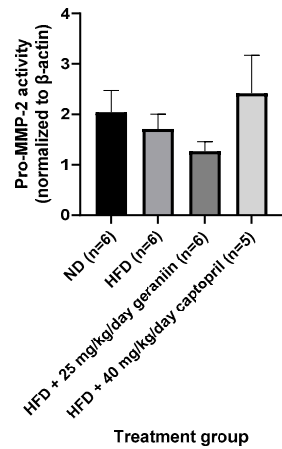

(c)

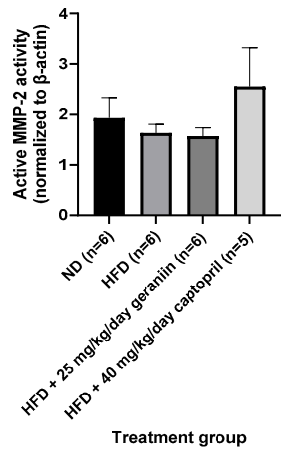

(d)

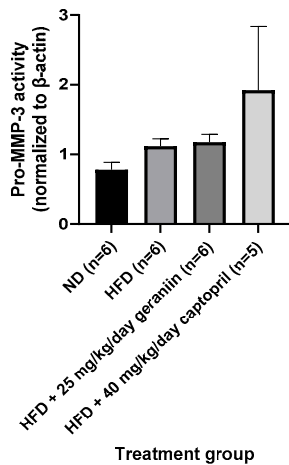

**Figure S5.** The activities of MMPs in the thoracic aorta of the rats assigned to different treatment groups. (a) Gelatin zymography of the thoracic aortae tissue homogenate. The activity of (b) pro-MMP-2, (c) active MMP-2, and (d) pro-MMP-3 in the thoracic aorta. Data are expressed as mean  $\pm$  SEM with n = 5-6. MMPs, matrix-metalloproteinases; ND, normal diet; HFD, high-fat diet.
